# Supplementary material for: Distribution, Genesis, and Human Health Risks of Groundwater Heavy Metals Impacted by the Typical Setting of Songnen Plain of NE China
Source: MDPI journal article supplement (doi:10.3390/ijerph19063571), 2022-03-17
Supplement: s1 [file s1]

**Supplementary materials for**

**Distribution, genesis and human health risks of  
groundwater heavy metals impacted by the typical setting  
of Songnen Plain of NE China**

Yuanzheng Zhai, Fuxin Zheng, Dongfan Li, Xinyi Cao, Yanguo Teng\*

Engineering Research Center for Groundwater Pollution Control and Remediation of Ministry of Education of China, College of Water Sciences, Beijing Normal University, Beijing 100875, China; zyz@bnu.edu.cn (Y.Z.); 202131470011@mail.bnu.edu.cn (F.Z.); 201821470013@mail.bnu.edu.cn (D.L.); 202021470003@mail.bnu.edu.cn (X.C.)

\* Correspondence: ygteng@bnu.edu.cn or teng1974@163.com

## Supplementary Tables

**Table S1** Measuring methods of parameters and detectable accuracy

| Heavy metal | Measuring method | Detectable limit (µg/L) | Relative standard deviation (%) | Relative error (%) | Recovery efficiencies (%) |
|-------------|------------------|-------------------------|---------------------------------|--------------------|---------------------------|
| As          | ICP-MS           | 0.002                   | 2.85                            | 1.78               | 91.3 - 102.2              |
| Ba          | ICP-AES          | 0.2                     | 3.43                            | 3.59               | 95.7 – 105.5              |
| Cd          | ICP-MS           | 0.0004                  | 5.12                            | 4.24               | 91.2 – 108.1              |
| Co          | ICP-MS           | 0.0003                  | 6.77                            | 2.28               | 88.7 – 103.5              |
| Cr          | ICP-MS           | 0.00008                 | 1.48                            | 2.20               | 85.5 – 107.3              |
| Cu          | ICP-MS           | 0.00002                 | 2.35                            | 2.08               | 96.4 – 110.5              |
| Fe          | ICP-AES          | 0.01                    | 8.87                            | 6.23               | 96.4 – 112.1              |
| Mn          | ICP-AES          | 0.5                     | 6.46                            | 3.33               | 90.7 – 107.5              |
| Ni          | ICP-MS           | 0.0001                  | 2.21                            | 3.42               | 93.6 – 108.5              |
| Pb          | ICP-MS           | 0.0003                  | 1.05                            | 5.21               | 89.4 – 112.3              |
| Zn          | ICP-MS           | 0.005                   | 1.04                            | 5.17               | 90.1 – 110.2              |

**Table S2** Parameters and their corresponding values in human health risks assessment

| Risk coefficient of carcinogenic heavy metals<br>(q <sub>i</sub> ) |       |       |       | Risk coefficient of carcinogenic heavy metals (R <sub>fdj</sub> ) |       |     |       |      |        |       |
|--------------------------------------------------------------------|-------|-------|-------|-------------------------------------------------------------------|-------|-----|-------|------|--------|-------|
| As                                                                 | Cd    | Cr    | Ba    | Co                                                                | Cu    | Fe  | Mn    | Ni   | Pb     | Zn    |
| 1.5                                                                | 6.1   | 41    | 0.02  | 0.02                                                              | 0.005 | 0.3 | 0.046 | 0.02 | 0.0014 | 0.003 |
| Per capita drinking water intake per unit weight (L/(kg·d))        |       |       |       |                                                                   |       |     |       |      |        |       |
| Child                                                              | Young | Adult | Elder |                                                                   |       |     |       |      |        |       |
| 0.073                                                              | 0.027 | 0.018 | 0.017 |                                                                   |       |     |       |      |        |       |

**Table S3** Health risks of each heavy metal to different populations

| Parameter | Child      |            | Young      |            | Adult      |            | Elder      |            |
|-----------|------------|------------|------------|------------|------------|------------|------------|------------|
|           | Wet season | Dry season |
| As        | 4.46E-05   | 3.82E-05   | 1.66E-05   | 1.41E-05   | 1.11E-05   | 9.43E-06   | 1.05E-05   | 8.91E-06   |
| Cd        | 2.89E-07   | 1.14E-07   | 1.07E-07   | 7.61E-08   | 7.13E-08   | 7.18E-08   | 6.73E-08   | 6.09E-08   |
| Cr        | 0.013146   | 0.006913   | 0.012399   | 0.005012   | 0.011316   | 0.003992   | 0.01112    | 0.00385    |
| Ba        | 5.33E-10   | 3.77E-10   | 2.08E-09   | 1.4E-10    | 1.31E-10   | 9.3E-11    | 1.24E-10   | 8.78E-11   |
| Co        | 1.55E-10   | 1.19E-10   | 9.61E-12   | 4.41E-11   | 3.82E-11   | 2.94E-11   | 3.61E-11   | 2.78E-11   |
| Cu        | 3.36E-10   | 1.45E-10   | 1.97E-10   | 5.38E-11   | 8.28E-11   | 3.59E-11   | 7.82E-11   | 3.39E-11   |
| Fe        | 8.9E-09    | 4.81E-09   | 1.62E-08   | 1.78E-09   | 2.19E-09   | 1.19E-09   | 2.07E-09   | 1.12E-09   |
| Mn        | 5.61E-09   | 4.18E-09   | 3.29E-09   | 1.55E-09   | 1.38E-09   | 1.03E-09   | 1.31E-09   | 9.73E-10   |
| Ni        | 3.3E-10    | 1.81E-10   | 5.74E-11   | 6.71E-11   | 8.14E-11   | 4.47E-11   | 7.69E-11   | 4.22E-11   |
| Pb        | 3.3E-10    | 9.31E-11   | 1.24E-10   | 3.44E-11   | 8.14E-11   | 2.3E-11    | 7.69E-11   | 2.17E-11   |
| Zn        | 2.6E-11    | 2.46E-11   | 1.22E-10   | 9.11E-12   | 6.4E-12    | 6.07E-12   | 6.05E-12   | 5.74E-12   |

Supplementary Figures

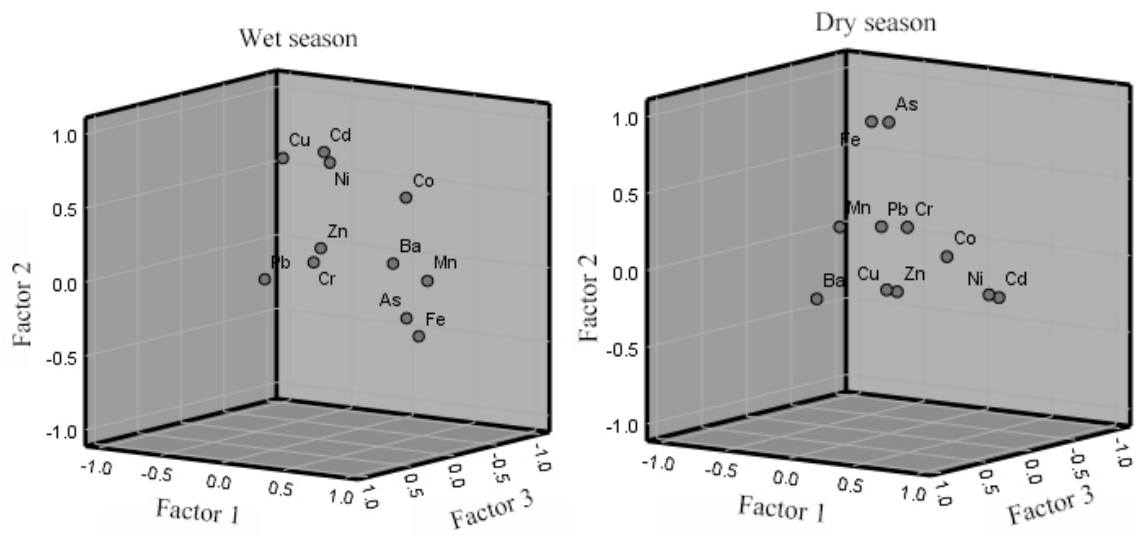

Figure S1 Loading diagram of heavy metals in groundwater

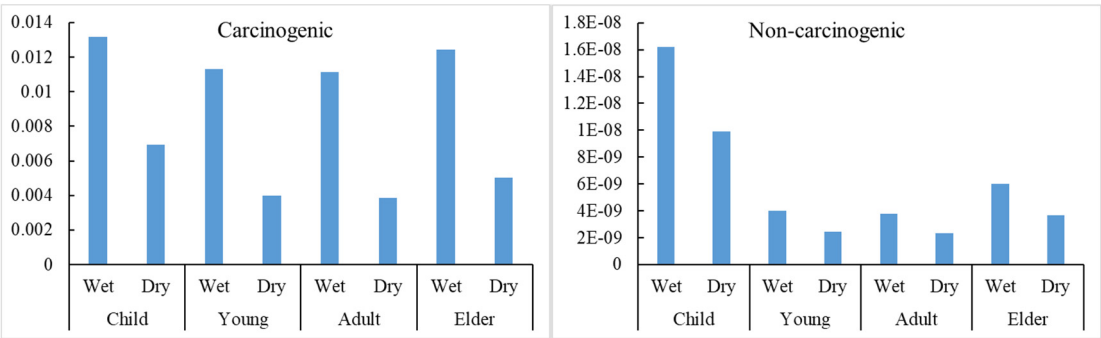

Figure S2 Bar chart of average R value caused by carcinogenic and non-carcinogenic

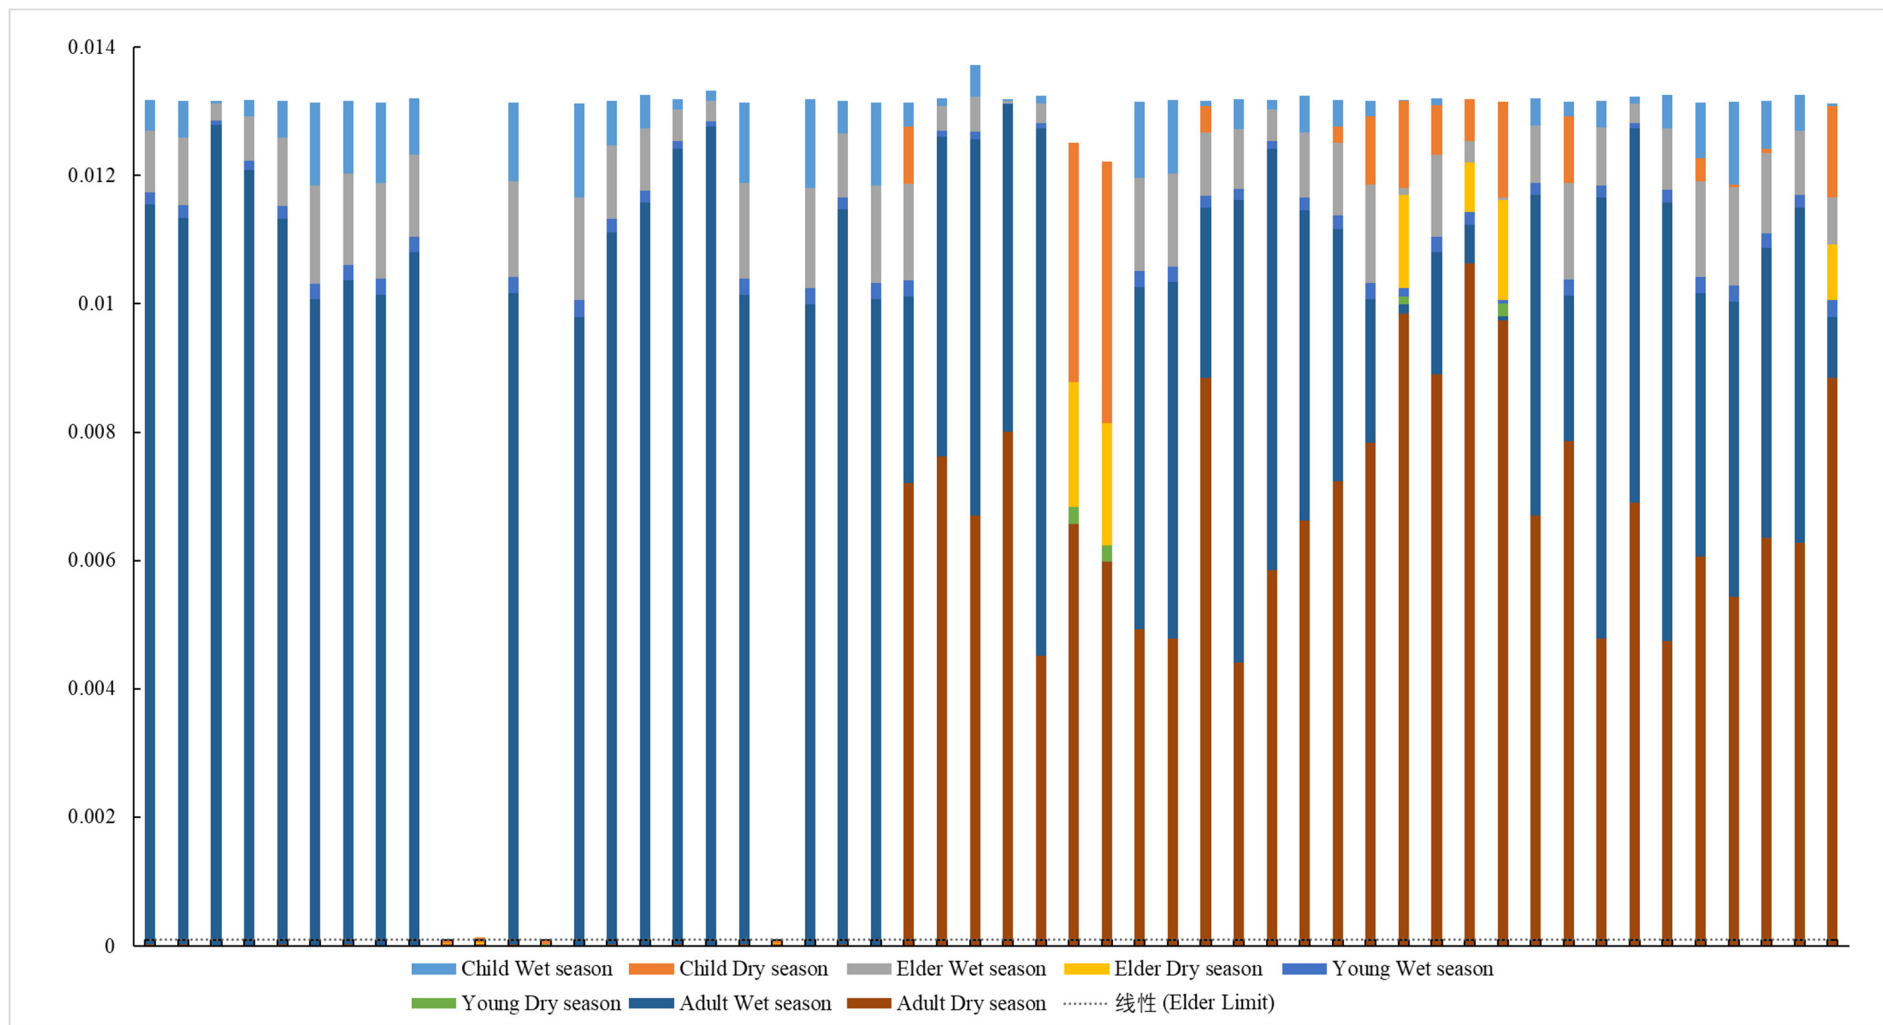

**Figure S3** R value of each sample
